# Supplementary material
Source: PubMed Central journal article supplement (PMC10455401)
Supplement: as9-2-e028-s001.pdf [file as9-2-e028-s001.pdf]

**Supplemental Digital Content 1. ICD-9/10 Codes for Anxiety and Depression**

| <b>Comorbidity</b> | <b>Code type</b> | <b>Codes</b>                               |
|--------------------|------------------|--------------------------------------------|
| <b>Anxiety</b>     | ICD-9            | 300.X                                      |
|                    | ICD-10           | F41.X, F43.0, F43.22, F43.23               |
| <b>Depression</b>  | ICD-9            | 300.4, 309.0, 309.1, 311                   |
|                    | ICD-10           | F32.X, F33.X, F34.X, F39.X, F43.21, F43.23 |
