# Supplementary material
Source: PubMed Central journal article supplement (PMC10455401)
Supplement: as9-2-e028-s002.pdf [file as9-2-e028-s002.pdf]

**Supplemental Digital Content 2.** Median Regression with %TBW Loss as the Outcome  
Comparing Medicaid and Non-Medicaid Subgroups

|                                                   | <b>Medicaid</b>                               | <b>Non-Medicaid</b>                           |
|---------------------------------------------------|-----------------------------------------------|-----------------------------------------------|
| <b>Variable</b>                                   | <b>% change in median weight<br/>(95% CI)</b> | <b>% change in median weight<br/>(95% CI)</b> |
| <b>Age (+5 years)</b>                             | 0.15 (-0.50, 0.78)                            | -0.39 (-0.78, 0.31)                           |
| <b>Sex</b>                                        |                                               |                                               |
| Female                                            | Ref.                                          | Ref.                                          |
| Male                                              | -3.44 (-6.68, 0.42)                           | 0.62 (-2.67, 2.27)                            |
| <b>Race/ethnicity</b>                             |                                               |                                               |
| Non-White                                         | Ref.                                          | Ref.                                          |
| White, non-Hispanic                               | -1.00 (-5.53, 3.42)                           | 2.75 (-2.35, 5.36)                            |
| <b>Surgery type</b>                               |                                               |                                               |
| Roux-en-Y gastric bypass                          | Ref.                                          | Ref.                                          |
| Sleeve gastrectomy                                | -7.83 (-13.65, -4.84)                         | -11.03 (-12.36, -7.56)                        |
| <b>Follow-up time (+1 year)</b>                   | -0.51 (-1.20, 0.45)                           | -1.15 (-1.50, -0.35)                          |
| <b>Preoperative diagnosis of type II diabetes</b> | -5.54 (-7.42, -0.48)                          | -1.44 (-2.80, 0.51)                           |
| <b>Area Deprivation Index (ADI) (+10 units)</b>   | 0.70 (-0.10, 1.25)                            | 0.68 (0.13, 1.08)                             |
| <b>Urbanicity (RUCA)</b>                          |                                               |                                               |
| Urban                                             | Ref.                                          | Ref.                                          |
| Micropolitan                                      | 1.11 (-4.10, 6.05)                            | -2.38 (-5.18, 3.89)                           |
| Rural                                             | 3.38 (-3.41, 5.77)                            | -3.54 (-6.09, 1.20)                           |
|                                                   |                                               |                                               |
| <b>Walkability (+1 unit)</b>                      | 0.23 (-0.16, 0.69)                            | -0.15 (-0.48, 0.24)                           |
