# Supplementary material
Source: PubMed Central journal article supplement (PMC10455401)
Supplement: as9-2-e028-s003.pdf [file as9-2-e028-s003.pdf]

**Supplemental Digital Content 3.** Postoperative Outcomes for Patients With Three Years of Follow-Up or More

|                                             | <b>Non-Medicaid</b> | <b>Medicaid</b> | <b>p-value</b> |
|---------------------------------------------|---------------------|-----------------|----------------|
| <b>90-day outcomes (n, %)</b>               |                     |                 |                |
| Emergency department visits                 | 54 (23.6)           | 33 (29.7)       | 0.308          |
| Readmissions                                | 30 (13.1)           | 20 (18.0)       | 0.247          |
| Reoperations                                | 5 (2.2)             | 1 (0.9)         | 0.427          |
| Dilations                                   | 19 (8.3)            | 10 (9.0)        | 0.848          |
| Anastomotic/staple line leak                | 2 (0.9)             | 0 (0.0)         | 0.375          |
| Hemorrhage                                  | 6 (2.6)             | 2 (1.8)         | 0.548          |
| Marginal ulcer                              | 4 (1.7)             | 4 (3.6)         | 0.494          |
| Wound complications                         | 8 (3.5)             | 2 (1.8)         | 0.417          |
| Other                                       | 14 (6.1)            | 7 (6.3)         | 0.480          |
| <b>1-year comorbidity resolution (n, %)</b> |                     |                 |                |
| Gastroesophageal reflux disease             | 50 (46.7)           | 30 (49.2)       | 0.872          |
| Hyperlipidemia                              | 40 (35.1)           | 16 (34.0)       | 1.000          |
| Hypertension                                | 55 (25.7)           | 24 (35.8)       | 1.000          |
| Obstructive sleep apnea                     | 50 (40.5)           | 30 (44.1)       | 0.657          |
| Type 2 diabetes mellitus                    | 59 (59.6)           | 33 (56.9)       | 0.741          |
| <b>1-year outcomes (n, %)</b>               |                     |                 |                |
| Revisions                                   | 3 (1.3)             | 0 (0.0)         | 0.475          |
| Anastomotic strictures                      | 11 (6.8)            | 8 (10.0)        | 0.554          |
| Sleeve stenosis                             | 4 (5.9)             | 2 (6.5)         | 1.000          |
