# Supplementary material
Source: PubMed Central journal article supplement (PMC10455401)
Supplement: as9-2-e028-s004.pdf [file as9-2-e028-s004.pdf]

**Supplemental Digital Content 4.** Weight Loss After Surgery for Patients With Three Years of Follow-Up or More

|                                                                          | <b>Non-Medicaid<br/>n = 229</b> | <b>Medicaid<br/>n = 111</b> | <b>p-value</b> |
|--------------------------------------------------------------------------|---------------------------------|-----------------------------|----------------|
| <b>Length of follow-up (years), median (IQR)</b>                         | 5.0 (1.5)                       | 5.2 (1.4)                   | 0.253          |
| <b>Postoperative BMI at most follow-up (kg/m<sup>2</sup>), mean (SD)</b> | 36.2 (8.4)                      | 38.2 (10.1)                 | 0.056          |
| <b>Absolute BMI change, mean (SD)</b>                                    | 9.7 (7.1)                       | 10.1 (7.0)                  | 0.596          |
| <b>% total body weight loss at most recent follow-up, mean (SD)</b>      | 20.7 (13.8)                     | 21.2 (14.0)                 | 0.783          |
