# Supplementary material
Source: PubMed Central journal article supplement (PMC10455401)
Supplement: as9-2-e028-s005.pdf [file as9-2-e028-s005.pdf]

**Supplemental Digital Content 5.** Median Regression with %TBW Loss as the Outcome for Patients With Three Years of Follow-Up or More

|                                                  | <b>Model 1</b>                    | <b>Model 2</b>                    | <b>Model 3</b>                    |
|--------------------------------------------------|-----------------------------------|-----------------------------------|-----------------------------------|
| <b>Variable</b>                                  | <b>Median % TBW loss (95% CI)</b> | <b>Median % TBW loss (95% CI)</b> | <b>Median % TBW loss (95% CI)</b> |
| <b>Medicaid status</b>                           |                                   |                                   |                                   |
| Non-Medicaid                                     | Ref.                              | Ref.                              | Ref.                              |
| Medicaid                                         | 2.51 (-0.48, 5.59)                | 1.21 (-1.72, 4.06)                | 1.21 (-1.72, 4.06)                |
| <b>Age (+5 years)</b>                            | --                                | 0.43 (-0.55, 0.76)                | 0.31 (-0.66, 0.92)                |
| <b>Sex</b>                                       |                                   |                                   |                                   |
| Female                                           | --                                | Ref.                              | Ref.                              |
| Male                                             | --                                | -0.19 (-4.98, 2.76)               | -0.41 (-4.55, 3.01)               |
| <b>Race/ethnicity</b>                            |                                   |                                   |                                   |
| Non-White                                        | --                                | Ref.                              | Ref.                              |
| White, non-Hispanic                              | --                                | -1.45 (-7.17, 1.11)               | -0.63 (-7.19, 4.61)               |
| <b>Surgery type</b>                              |                                   |                                   |                                   |
| Roux-en-Y gastric bypass                         | --                                | Ref.                              | Ref.                              |
| Sleeve gastrectomy                               | --                                | -12.86 (-16.64, -8.85)            | -13.40 (-16.83, -8.67)            |
| <b>Follow-up time (+1 year)</b>                  | --                                | -0.33 (-1.06, 0.73)               | -0.26 (-1.11, 0.69)               |
| <b>Preoperative diagnosis of type 2 diabetes</b> | --                                | -3.97 (-6.39, -2.11)              | -3.97 (-6.96, -2.21)              |
| <b>Area Deprivation Index (ADI) (+10 units)</b>  | --                                | --                                | 0.58 (-0.20, 1.14)                |
| <b>Urbanicity (RUCA)</b>                         |                                   |                                   |                                   |
| Urban                                            | --                                | --                                | Ref.                              |
| Micropolitan                                     | --                                | --                                | -0.86 (-4.54, 5.02)               |
| Rural                                            | --                                | --                                | -4.23 (-6.53, 0.49)               |
| <b>Walkability (Walkability Index) (+1 unit)</b> | --                                | --                                | 0.06 (-0.28, 0.58)                |
